# Supplementary material for: A Filtering Method to Generate High Quality Short Reads Using Illumina Paired-End Technology
Source: PLoS One. 2013 Jun 17;8(6):e66643. doi: 10.1371/journal.pone.0066643 (PMC3684618; doi:10.1371/journal.pone.0066643)
Supplement: Table S2 — Number of reads that failed during the filtering process for each method by sample, read direction, and the number of undetermined residues (Ns) present. (XLS) [file pone.0066643.s002.xls]

## Sheet: Quality Filtering Results
Samples	Total Number of Pairs	Bokulich et al.							Minoche et al.								Complete Overlap
		Passed	Failed	Failed (P)	Failed (N)	Failed in 1	Failed in 2	Both Failed	Passed	Failed	Failed (P)	Failed (N)	Failed (C33)	Failed in 1	Failed in 2	Both Failed	Passed	Failed	Failed (FP)	Failed (RP)	Failed Mismatch
9022_B9	122929	110582	12347	12315	32	754	11101	492	109041	13888	12223	38	1627	815	12193	880	91654	31275	15309	4181	11785
9022_D9	56666	50803	5863	5851	12	352	5264	247	50098	6568	5818	13	737	409	5751	408	41819	14847	7356	2025	5466
9022_F9	89400	80363	9037	9017	20	595	8047	395	79180	10220	8951	23	1246	701	8862	657	67017	22383	10923	3068	8392
9027_B10	132468	118330	14138	14097	41	820	12843	475	116799	15669	13990	43	1636	935	13825	909	99157	33311	16988	4458	11865
9027_D10	86277	77018	9259	9244	15	583	8315	361	75913	10364	9178	17	1169	653	9049	662	64414	21863	11307	2865	7691
9027_F10	119421	106857	12564	12533	31	841	11209	514	105455	13966	12459	35	1472	930	12107	929	89767	29654	15044	3940	10670
9114_A5	236743	213786	22957	22906	51	1590	20575	792	210283	26460	22755	63	3642	1651	23321	1488	167741	69002	32468	7260	29274
9114_C5	55298	49834	5464	5453	11	395	4840	229	48987	6311	5409	15	887	409	5491	411	39752	15546	7034	1829	6683
9114_E5	73289	66151	7138	7123	15	478	6323	337	65101	8188	7085	15	1088	527	7112	549	53333	19956	9217	2295	8444
9116_A6	145446	129175	16271	16230	41	878	14841	552	126368	19078	16098	46	2934	929	17113	1036	102276	43170	21437	4724	17009
9116_C6	52686	46878	5808	5798	10	327	5283	198	45891	6795	5756	10	1029	337	6067	391	37769	14917	7261	1808	5848
9116_E6	85610	76081	9529	9514	15	551	8605	373	74576	11034	9441	16	1577	582	9770	682	61831	23779	11392	3011	9376
9121_A8	44721	40096	4625	4617	8	324	4108	193	39353	5368	4596	10	762	306	4688	374	33117	11604	5228	1704	4672
9121_C8	6785	6051	734	732	2	54	640	40	5912	873	727	3	143	60	750	63	4999	1786	851	248	687
9121_E9	19807	17805	2002	1997	5	149	1762	91	17488	2319	1987	5	327	165	1998	156	14642	5165	2321	733	2111
9127_A7	55692	50081	5611	5598	13	395	4975	241	49432	6260	5560	15	685	398	5428	434	41495	14197	6663	2009	5525
9127_C7	7596	6788	808	807	1	56	711	41	6675	921	801	1	119	58	788	75	5599	1997	928	289	780
9127_E7	16135	14544	1591	1588	3	104	1412	75	14318	1817	1577	3	237	121	1567	129	12110	4025	1784	638	1603
9132_A9	180819	160981	19838	19800	38	1103	17969	766	158811	22008	19659	49	2300	1217	19483	1308	131882	48937	25840	6062	17035
9132_C9	52232	46391	5841	5827	14	357	5237	247	45717	6515	5783	15	717	382	5723	410	38058	14174	7243	1900	5031
9132_E9	73975	65712	8263	8248	15	487	7420	356	64796	9179	8189	24	966	546	8046	587	54120	19855	10175	2653	7027
9133_A10	165929	147847	18082	18037	45	1078	16348	656	145727	20202	17909	50	2243	1164	17864	1174	119382	46547	23276	5596	17675
9133_C10	73455	65433	8022	8006	16	542	7148	332	64382	9073	7947	18	1108	577	7889	607	53200	20255	9964	2552	7739
9133_E10	95574	85242	10332	10316	16	750	9159	423	84045	11529	10245	23	1261	791	9977	761	69906	25668	12641	3221	9806
9134_A11	196334	176709	19625	19572	53	1086	17875	664	174112	22222	19442	57	2723	1257	19736	1229	143996	52338	26478	5446	20414
9134_C11	51580	46355	5225	5212	13	291	4741	193	45721	5859	5168	16	675	318	5191	350	38123	13457	6719	1559	5179
9134_E11	71595	64313	7282	7268	14	438	6578	266	63414	8181	7211	17	953	479	7176	526	53312	18283	9058	2041	7184
9797_A12	191696	171259	20437	20399	38	1280	18359	798	168459	23237	20267	44	2926	1385	20456	1396	139968	51728	26101	6775	18852
9797_C12	38164	34141	4023	4008	15	295	3556	172	33606	4558	3990	17	551	291	3970	297	27913	10251	5047	1380	3824
9797_E12	51769	46265	5504	5494	10	367	4871	266	45556	6213	5450	10	753	398	5386	429	38319	13450	6736	1874	4840
ecoli_A1	828243	737717	90526	90300	226	4527	82705	3294	731937	96306	89727	267	6312	5173	85661	5472	618589	209654	122294	21490	65870
ecoli_C1	90771	80247	10524	10500	24	583	9507	434	79545	11226	10430	27	769	651	9899	676	67293	23478	13363	2923	7192
ecoli_E1	114145	101384	12761	12724	37	749	11505	507	100589	13556	12637	42	877	818	11918	820	85248	28897	16229	3366	9302
