# Supplementary material for: A Filtering Method to Generate High Quality Short Reads Using Illumina Paired-End Technology
Source: PLoS One. 2013 Jun 17;8(6):e66643. doi: 10.1371/journal.pone.0066643 (PMC3684618; doi:10.1371/journal.pone.0066643)
Supplement: Table S3 — Number of clusters identified at 96%, 97% and 100% sequence similarity thresholds in reads filtered by Bokulich, Minoche and Complete Overlap methods. (XLSX) [file pone.0066643.s003.xlsx]

## Sheet: # OTUs at 96%, min OTU size = 2
Samples	Random subsampling trial	Bokulich et al.	Minoche et al.	Complete Overlap
9022_B9	#1	2342	2298	1788
	#2	2272	2339	1788
	#3	2247	2247	1788
	#4	2263	2312	1788
	#5	2254	2203	1788
9022_D9	#1	1425	1417	1090
	#2	1436	1405	1090
	#3	1403	1395	1090
	#4	1416	1413	1090
	#5	1365	1439	1090
9022_F9	#1	1898	1902	1481
	#2	1868	1917	1481
	#3	1910	1873	1481
	#4	1834	1864	1481
	#5	1895	1884	1481
9027_B10	#1	2686	2713	2091
	#2	2670	2629	2091
	#3	2660	2705	2091
	#4	2653	2720	2091
	#5	2709	2669	2091
9027_D10	#1	2029	2048	1652
	#2	2031	2018	1652
	#3	2044	2065	1652
	#4	2025	2034	1652
	#5	1977	2071	1652
9027_F10	#1	2575	2596	2013
	#2	2596	2588	2013
	#3	2567	2545	2013
	#4	2579	2547	2013
	#5	2515	2647	2013
9114_A5	#1	3570	3557	2634
	#2	3629	3550	2634
	#3	3581	3549	2634
	#4	3599	3575	2634
	#5	3534	3502	2634
9114_C5	#1	1401	1405	1040
	#2	1392	1404	1040
	#3	1390	1382	1040
	#4	1376	1424	1040
	#5	1400	1429	1040
9114_E5	#1	1780	1775	1283
	#2	1803	1817	1283
	#3	1788	1780	1283
	#4	1805	1778	1283
	#5	1780	1793	1283
9116_A6	#1	2383	2317	1729
	#2	2303	2375	1729
	#3	2319	2336	1729
	#4	2347	2339	1729
	#5	2332	2345	1729
9116_C6	#1	1181	1236	916
	#2	1200	1234	916
	#3	1198	1183	916
	#4	1196	1228	916
	#5	1213	1226	916
9116_E6	#1	1666	1747	1289
	#2	1749	1727	1289
	#3	1701	1728	1289
	#4	1691	1753	1289
	#5	1729	1728	1289
9121_A8	#1	621	634	490
	#2	601	617	490
	#3	614	639	490
	#4	633	625	490
	#5	595	607	490
9121_C8	#1	187	187	141
	#2	184	191	141
	#3	186	194	141
	#4	178	194	141
	#5	177	193	141
9121_E9	#1	397	387	301
	#2	387	416	301
	#3	421	395	301
	#4	396	396	301
	#5	394	396	301
9127_A7	#1	910	921	722
	#2	917	920	722
	#3	910	935	722
	#4	933	903	722
	#5	913	912	722
9127_C7	#1	248	239	198
	#2	241	235	198
	#3	240	242	198
	#4	249	255	198
	#5	246	242	198
9127_E7	#1	417	414	322
	#2	414	423	322
	#3	440	420	322
	#4	436	418	322
	#5	391	432	322
9132_A9	#1	6967	7070	5277
	#2	6998	6992	5277
	#3	6999	7020	5277
	#4	7065	7014	5277
	#5	7108	7013	5277
9132_C9	#1	2926	2932	2160
	#2	2937	2937	2160
	#3	2889	2940	2160
	#4	2929	2921	2160
	#5	2927	2954	2160
9132_E9	#1	3849	3913	2887
	#2	3840	3889	2887
	#3	3882	3895	2887
	#4	3884	3847	2887
	#5	3934	3915	2887
9133_A10	#1	4788	4739	3525
	#2	4748	4793	3525
	#3	4766	4835	3525
	#4	4668	4773	3525
	#5	4728	4784	3525
9133_C10	#1	2745	2830	2081
	#2	2747	2818	2081
	#3	2774	2802	2081
	#4	2834	2830	2081
	#5	2802	2857	2081
9133_E10	#1	3512	3508	2648
	#2	3532	3541	2648
	#3	3562	3533	2648
	#4	3514	3592	2648
	#5	3546	3485	2648
9134_A11	#1	4793	4910	3760
	#2	4933	4935	3760
	#3	4909	4954	3760
	#4	4888	4964	3760
	#5	4938	4956	3760
9134_C11	#1	1945	1941	1427
	#2	1968	1973	1427
	#3	1929	2011	1427
	#4	1916	1930	1427
	#5	1960	1976	1427
9134_E11	#1	2531	2647	1896
	#2	2634	2566	1896
	#3	2594	2617	1896
	#4	2591	2616	1896
	#5	2649	2596	1896
9797_A12	#1	2552	2607	1891
	#2	2579	2622	1891
	#3	2624	2622	1891
	#4	2544	2624	1891
	#5	2600	2586	1891
9797_C12	#1	974	982	709
	#2	967	950	709
	#3	944	935	709
	#4	954	957	709
	#5	944	943	709
9797_E12	#1	1149	1161	847
	#2	1199	1143	847
	#3	1125	1144	847
	#4	1141	1167	847
	#5	1123	1143	847
ecoli_A1	#1	179	160	56
	#2	165	165	56
	#3	160	162	56
	#4	167	174	56
	#5	164	154	56
ecoli_C1	#1	50	39	14
	#2	49	46	14
	#3	44	48	14
	#4	45	43	14
	#5	48	48	14
ecoli_E1	#1	63	59	25
	#2	65	69	25
	#3	62	63	25
	#4	59	63	25
	#5	62	63	25

## Sheet: # OTUs at 97%, min OTU size = 2
Samples	Random subsampling trial	Bokulich et al.	Minoche et al.	Complete Overlap
9022_B9	#1	2599	2552	1936
	#2	2546	2603	1936
	#3	2511	2554	1936
	#4	2515	2642	1936
	#5	2533	2481	1936
9022_D9	#1	1508	1505	1140
	#2	1538	1507	1140
	#3	1524	1499	1140
	#4	1501	1515	1140
	#5	1461	1545	1140
9022_F9	#1	2037	2045	1556
	#2	2026	2063	1556
	#3	2048	2001	1556
	#4	1977	2016	1556
	#5	2062	2031	1556
9027_B10	#1	2960	2965	2245
	#2	2948	2882	2245
	#3	2919	2980	2245
	#4	2913	2980	2245
	#5	2957	2911	2245
9027_D10	#1	2205	2195	1760
	#2	2190	2150	1760
	#3	2206	2238	1760
	#4	2204	2187	1760
	#5	2141	2240	1760
9027_F10	#1	2796	2803	2138
	#2	2823	2806	2138
	#3	2776	2743	2138
	#4	2808	2747	2138
	#5	2710	2851	2138
9114_A5	#1	4158	4149	3015
	#2	4206	4187	3015
	#3	4134	4117	3015
	#4	4186	4149	3015
	#5	4080	4075	3015
9114_C5	#1	1542	1546	1106
	#2	1545	1576	1106
	#3	1549	1565	1106
	#4	1552	1588	1106
	#5	1569	1607	1106
9114_E5	#1	1969	1945	1385
	#2	1986	1990	1385
	#3	1980	1971	1385
	#4	2007	1958	1385
	#5	1963	1956	1385
9116_A6	#1	2687	2621	1908
	#2	2621	2667	1908
	#3	2648	2640	1908
	#4	2639	2637	1908
	#5	2655	2655	1908
9116_C6	#1	1306	1375	986
	#2	1336	1357	986
	#3	1330	1312	986
	#4	1329	1360	986
	#5	1358	1362	986
9116_E6	#1	1856	1924	1413
	#2	1939	1921	1413
	#3	1880	1905	1413
	#4	1881	1933	1413
	#5	1894	1889	1413
9121_A8	#1	684	700	523
	#2	648	684	523
	#3	678	716	523
	#4	705	688	523
	#5	667	676	523
9121_C8	#1	199	199	148
	#2	194	200	148
	#3	197	205	148
	#4	189	210	148
	#5	188	201	148
9121_E9	#1	428	438	325
	#2	430	458	325
	#3	460	432	325
	#4	420	435	325
	#5	451	438	325
9127_A7	#1	1021	1037	780
	#2	1023	1020	780
	#3	1013	1044	780
	#4	1022	1003	780
	#5	1008	1016	780
9127_C7	#1	263	252	205
	#2	255	252	205
	#3	255	261	205
	#4	265	266	205
	#5	263	256	205
9127_E7	#1	437	441	332
	#2	434	444	332
	#3	458	452	332
	#4	456	443	332
	#5	413	457	332
9132_A9	#1	7660	7758	5752
	#2	7700	7729	5752
	#3	7692	7631	5752
	#4	7725	7750	5752
	#5	7732	7714	5752
9132_C9	#1	3118	3104	2279
	#2	3100	3104	2279
	#3	3090	3111	2279
	#4	3105	3071	2279
	#5	3106	3130	2279
9132_E9	#1	4099	4153	3069
	#2	4083	4117	3069
	#3	4148	4152	3069
	#4	4123	4114	3069
	#5	4160	4172	3069
9133_A10	#1	5317	5277	3830
	#2	5276	5322	3830
	#3	5293	5368	3830
	#4	5160	5312	3830
	#5	5225	5300	3830
9133_C10	#1	2988	3060	2209
	#2	2977	3077	2209
	#3	2995	3029	2209
	#4	3058	3060	2209
	#5	3045	3106	2209
9133_E10	#1	3805	3807	2830
	#2	3815	3865	2830
	#3	3871	3848	2830
	#4	3827	3889	2830
	#5	3835	3777	2830
9134_A11	#1	5266	5397	4059
	#2	5436	5423	4059
	#3	5398	5471	4059
	#4	5366	5464	4059
	#5	5414	5456	4059
9134_C11	#1	2065	2077	1513
	#2	2099	2121	1513
	#3	2054	2152	1513
	#4	2037	2074	1513
	#5	2096	2126	1513
9134_E11	#1	2701	2820	2018
	#2	2817	2747	2018
	#3	2783	2808	2018
	#4	2775	2809	2018
	#5	2834	2775	2018
9797_A12	#1	2894	3013	2086
	#2	2959	2974	2086
	#3	2979	3032	2086
	#4	2931	2988	2086
	#5	2991	2965	2086
9797_C12	#1	1073	1063	741
	#2	1043	1033	741
	#3	1029	1020	741
	#4	1042	1038	741
	#5	1026	1040	741
9797_E12	#1	1278	1270	912
	#2	1315	1256	912
	#3	1234	1249	912
	#4	1274	1271	912
	#5	1237	1259	912
ecoli_A1	#1	828	819	352
	#2	812	812	352
	#3	771	827	352
	#4	803	850	352
	#5	824	805	352
ecoli_C1	#1	107	94	48
	#2	107	128	48
	#3	107	99	48
	#4	103	133	48
	#5	108	98	48
ecoli_E1	#1	142	128	61
	#2	132	144	61
	#3	144	133	61
	#4	136	136	61
	#5	128	135	61

## Sheet: # OTUs at 100%, min OTU size =2
Samples	Random subsampling trial	Bokulich et al.	Minoche et al.	Complete Overlap
9022_B9	#1	4215	4134	2907
	#2	4178	4203	2907
	#3	4091	4101	2907
	#4	4146	4190	2907
	#5	4141	4066	2907
9022_D9	#1	2253	2273	1523
	#2	2244	2196	1523
	#3	2234	2222	1523
	#4	2204	2250	1523
	#5	2182	2290	1523
9022_F9	#1	3204	3172	2198
	#2	3147	3159	2198
	#3	3150	3125	2198
	#4	3109	3118	2198
	#5	3138	3162	2198
9027_B10	#1	4583	4639	3270
	#2	4613	4575	3270
	#3	4583	4610	3270
	#4	4581	4677	3270
	#5	4585	4537	3270
9027_D10	#1	3272	3311	2373
	#2	3257	3262	2373
	#3	3273	3331	2373
	#4	3254	3263	2373
	#5	3207	3306	2373
9027_F10	#1	4317	4294	3061
	#2	4321	4346	3061
	#3	4283	4300	3061
	#4	4340	4232	3061
	#5	4208	4331	3061
9114_A5	#1	6923	6828	4932
	#2	6966	6852	4932
	#3	6903	6897	4932
	#4	6952	6916	4932
	#5	6898	6753	4932
9114_C5	#1	2253	2247	1557
	#2	2226	2249	1557
	#3	2227	2242	1557
	#4	2214	2260	1557
	#5	2236	2281	1557
9114_E5	#1	2836	2871	1945
	#2	2883	2889	1945
	#3	2832	2825	1945
	#4	2869	2844	1945
	#5	2855	2873	1945
9116_A6	#1	4539	4420	3168
	#2	4501	4490	3168
	#3	4496	4549	3168
	#4	4542	4526	3168
	#5	4512	4519	3168
9116_C6	#1	2019	2049	1405
	#2	1974	2034	1405
	#3	1994	2009	1405
	#4	1992	2038	1405
	#5	2052	2034	1405
9116_E6	#1	2969	3003	2049
	#2	2982	2922	2049
	#3	2926	2978	2049
	#4	2897	3019	2049
	#5	2955	2956	2049
9121_A8	#1	1278	1308	902
	#2	1278	1270	902
	#3	1251	1287	902
	#4	1298	1279	902
	#5	1263	1258	902
9121_C8	#1	318	299	200
	#2	290	297	200
	#3	302	308	200
	#4	296	307	200
	#5	295	306	200
9121_E9	#1	698	708	479
	#2	697	728	479
	#3	751	690	479
	#4	720	714	479
	#5	700	686	479
9127_A7	#1	1791	1775	1269
	#2	1804	1782	1269
	#3	1786	1797	1269
	#4	1779	1770	1269
	#5	1766	1784	1269
9127_C7	#1	356	358	259
	#2	343	354	259
	#3	362	363	259
	#4	371	357	259
	#5	358	368	259
9127_E7	#1	641	643	449
	#2	644	674	449
	#3	696	666	449
	#4	676	659	449
	#5	632	657	449
9132_A9	#1	10257	10364	7444
	#2	10321	10310	7444
	#3	10282	10267	7444
	#4	10282	10373	7444
	#5	10330	10326	7444
9132_C9	#1	3855	3834	2724
	#2	3824	3846	2724
	#3	3828	3857	2724
	#4	3839	3809	2724
	#5	3847	3857	2724
9132_E9	#1	5129	5150	3670
	#2	5099	5144	3670
	#3	5164	5194	3670
	#4	5166	5130	3670
	#5	5200	5147	3670
9133_A10	#1	7475	7432	5309
	#2	7417	7477	5309
	#3	7493	7575	5309
	#4	7388	7517	5309
	#5	7472	7539	5309
9133_C10	#1	3973	4102	2840
	#2	3923	4071	2840
	#3	3955	3980	2840
	#4	4057	4042	2840
	#5	4054	4075	2840
9133_E10	#1	5143	5143	3667
	#2	5152	5138	3667
	#3	5158	5219	3667
	#4	5168	5226	3667
	#5	5178	5130	3667
9134_A11	#1	7730	7806	5666
	#2	7877	7846	5666
	#3	7767	7864	5666
	#4	7836	7924	5666
	#5	7862	7859	5666
9134_C11	#1	2720	2752	1914
	#2	2727	2756	1914
	#3	2697	2802	1914
	#4	2702	2735	1914
	#5	2755	2746	1914
9134_E11	#1	3636	3748	2616
	#2	3727	3737	2616
	#3	3777	3755	2616
	#4	3711	3742	2616
	#5	3770	3706	2616
9797_A12	#1	5454	5543	3836
	#2	5560	5554	3836
	#3	5548	5567	3836
	#4	5432	5576	3836
	#5	5587	5513	3836
9797_C12	#1	1628	1641	1086
	#2	1589	1624	1086
	#3	1600	1627	1086
	#4	1601	1617	1086
	#5	1566	1607	1086
9797_E12	#1	1994	2050	1371
	#2	2042	2000	1371
	#3	1977	2001	1371
	#4	1959	2004	1371
	#5	2002	1977	1371
ecoli_A1	#1	1374	1355	811
	#2	1383	1354	811
	#3	1313	1378	811
	#4	1360	1389	811
	#5	1353	1348	811
ecoli_C1	#1	256	244	161
	#2	258	255	161
	#3	260	254	161
	#4	259	266	161
	#5	253	237	161
ecoli_E1	#1	309	295	191
	#2	311	314	191
	#3	320	309	191
	#4	310	296	191
	#5	308	310	191
